# Supplementary material
Source: Springer Nature journal article supplement (https://www.springermedizin.de/resource/supplementary/12872_2014_795_MOESM2_ESM.pdf/9430532)
Supplement: MOESM2 [file 9430532]

|                    |                                                        |                  |
|--------------------|--------------------------------------------------------|------------------|
|                    | $\geq 40$                                              | $> 9$            |
| $> 75$             | 35 to $< 40$                                           | $> 8 - 9$        |
| 65 to 75           | 30 to $< 35$                                           | $> 7 - 8$        |
| 45 to 64           | 25 to $< 30$                                           | $> 6.5 - 7$      |
| $< 45$             | $< 25$                                                 | $\leq 6.5$       |
| Age (*)<br>(years) | BMI ( $\blacktriangle$ )<br>( $\text{kg}/\text{m}^2$ ) | HbA1c (O)<br>(%) |

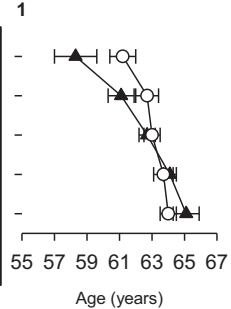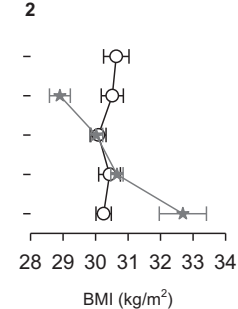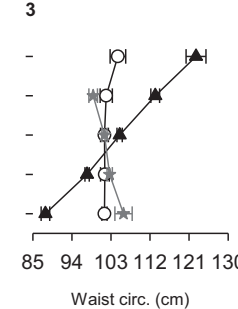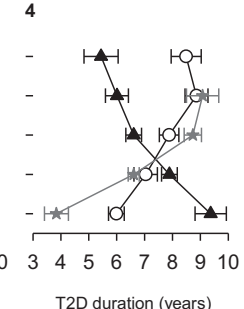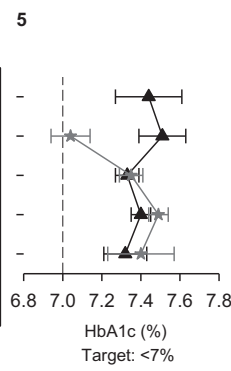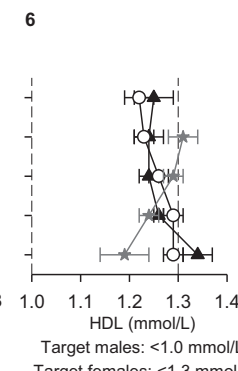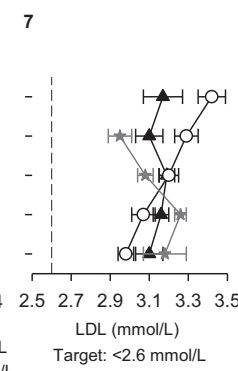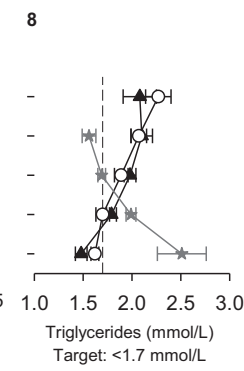

|                    |                                                        |                  |
|--------------------|--------------------------------------------------------|------------------|
|                    | $\geq 40$                                              | $> 9$            |
| $> 75$             | 35 to $< 40$                                           | $> 8 - 9$        |
| 65 to 75           | 30 to $< 35$                                           | $> 7 - 8$        |
| 45 to 64           | 25 to $< 30$                                           | $> 6.5 - 7$      |
| $< 45$             | $< 25$                                                 | $\leq 6.5$       |
| Age (*)<br>(years) | BMI ( $\blacktriangle$ )<br>( $\text{kg}/\text{m}^2$ ) | HbA1c (O)<br>(%) |

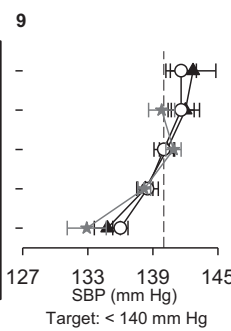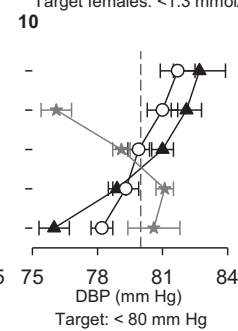

|                    |                                                        |                  |
|--------------------|--------------------------------------------------------|------------------|
|                    | $\geq 40$                                              | $> 9$            |
| $> 75$             | 35 to $< 40$                                           | $> 8 - 9$        |
| 65 to 75           | 30 to $< 35$                                           | $> 7 - 8$        |
| 45 to 64           | 25 to $< 30$                                           | $> 6.5 - 7$      |
| $< 45$             | $< 25$                                                 | $\leq 6.5$       |
| Age (*)<br>(years) | BMI ( $\blacktriangle$ )<br>( $\text{kg}/\text{m}^2$ ) | HbA1c (O)<br>(%) |
